# Supplementary material for: mTOR Signaling and SREBP Activity Increase FADS2 Expression and Can Activate Sapienate Biosynthesis
Source: PubMed Central journal article supplement — Cell Rep. 2020 Jun 23;31(12):107806. doi: 10.1016/j.celrep.2020.107806 (PMC7326293; doi:10.1016/j.celrep.2020.107806), 2020-06-23
Supplement: mmc1.pdf [file mmc1.pdf]

**Cell Reports, Volume 31**

**Supplemental Information**

**mTOR Signaling and SREBP Activity**

**Increase FADS2 Expression**

**and Can Activate Sapienate Biosynthesis**

**Mouna Triki, Gianmarco Rinaldi, Melanie Planque, Dorien Broekaert, Alina M. Winkelkotte, Carina R. Maier, Sudha Janaki Raman, Anke Vandekeere, Joke Van Elsen, Martin F. Orth, Thomas G.P. Grünewald, Almut Schulze, and Sarah-Maria Fendt**

Supplementary figures and tables

Figure S1

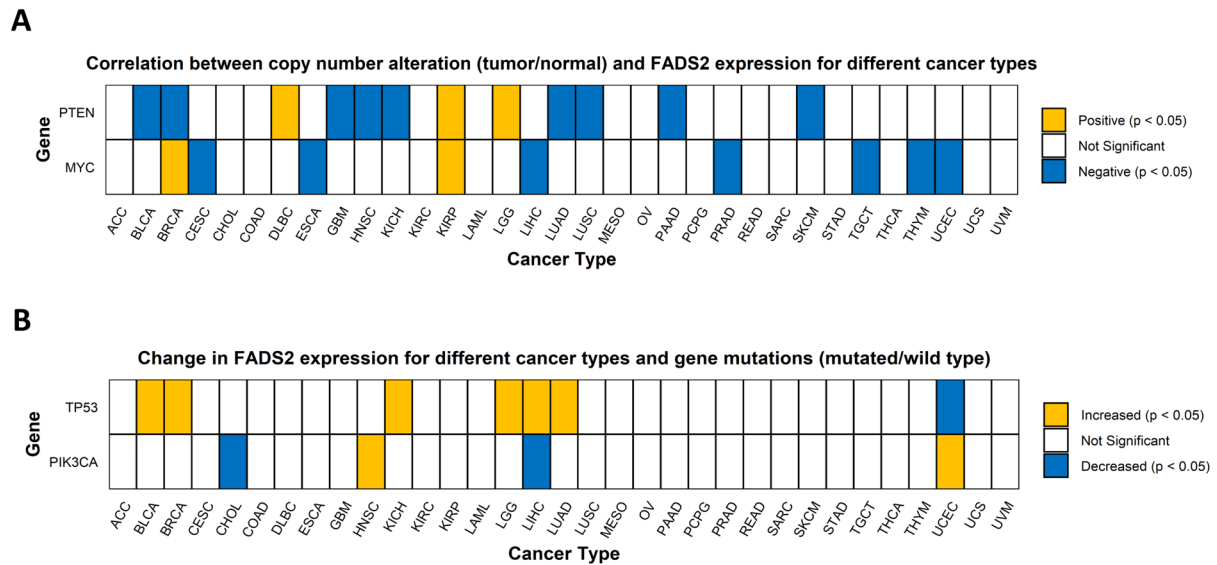

**Figure S1:** Correlation of *FADS2* expression with copy number and DNA mutations status of signature genes in TCGA database, Related to **Figure 1** and **Table S4**

**(A)** Heat map representing the correlation between *FADS2* expression and the average copy number alteration of *PTEN* and *MYC* based on the TCGA data derived from 12,650 patients representing 33 major human cancer type. Positive correlations ( $p < 0.05$ ) are indicated in yellow and negative correlations ( $p < 0.05$ ) are indicated in blue. No significant correlations ( $p > 0.05$ ) are presented in white.

**(B)** Heat map representing the correlation between *FADS2* and the average of *TP53* and *PIK3CA* mutations. TCGA samples representing 33 major human cancer type were divided by mutation status of *TP53* and *PIK3CA* in wild type and mutated (defined as having any type of mutation) and *FADS2* expression was compared between both groups using a t-test. Correlations ( $p < 0.05$ ) between increased *FADS2* expression and the presence of mutations are indicated in yellow; correlations ( $p < 0.05$ ) between decreased *FADS2* expression and the presence of mutations are indicated in blue. No significant correlations ( $p > 0.05$ ) are presented in white.

ACC: Adrenocortical carcinoma, BLCA: Bladder Urothelial Carcinoma, BRCA: Breast invasive carcinoma, CESC: Cervical squamous cell carcinoma and endocervical adenocarcinoma, CHOL: Cholangiocarcinoma, COAD: Colon adenocarcinoma, DLBC: Lymphoid Neoplasm Diffuse Large B-cell Lymphoma, ESCA: Esophageal carcinoma, GBM: Glioblastoma multiforme, HNSC: Head and Neck squamous cell carcinoma, KICH: Kidney Chromophobe, KIRC: Kidney renal clear cell carcinoma, KIRP: Kidney renal papillary cell

carcinoma, LAML: Acute Myeloid Leukemia, LGG: Brain Lower Grade Glioma, LIHC: Liver hepatocellular carcinoma, LUAD: Lung adenocarcinoma, LUSC: Lung squamous cell carcinoma, MESO: Mesothelioma, OV: Ovarian serous cystadenocarcinoma, PAAD: Pancreatic adenocarcinoma, PCPG: Pheochromocytoma and Paranglioma, PRAD: Prostate adenocarcinoma, READ: Rectum adenocarcinoma, SARC: Sarcoma, SKCM: Skin Cutaneous Melanoma, STAD: Stomach adenocarcinoma, TGCT: Testicular Germ Cell Tumors, THCA: Thyroid carcinoma, THYM: Thymoma, UCEC: Uterine Corpus Endometrial Carcinoma, UCS: Uterine Carcinosarcoma, UVM: Uveal Melanoma

**Figure S2**

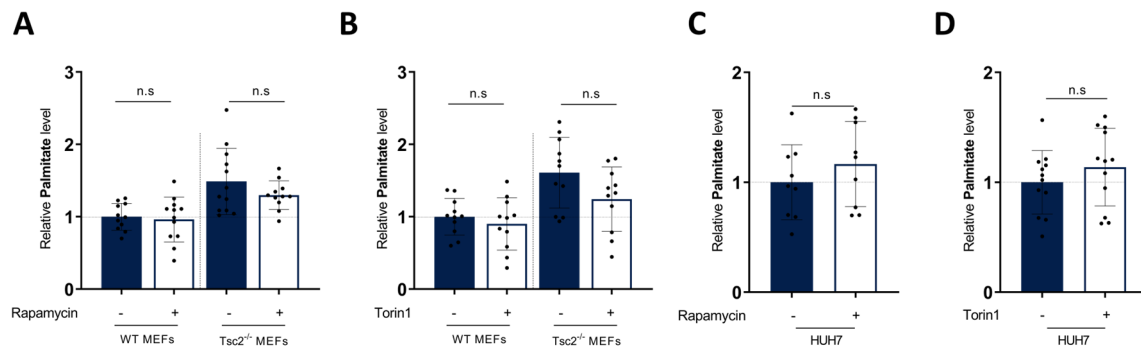

**Figure S2: mTOR inhibition does not alter palmitate levels, Related to Figure 2 and Figure 3**

**(A, B)** Relative palmitate level upon treatment with DMSO (**A**, N=12, **B**, N=11), rapamycin (**A**) (20 nM, 72 h, N=12) or Torin1 (**B**) (40 nM, 72 h, N=11) in WT and *Tsc2*<sup>-/-</sup> MEFs. Bar graphs are presented as mean  $\pm$  SD from biological independent samples. Statistical testing was performed by a two-sided unpaired Student's t test.

**(C, D)** Relative palmitate level upon treatment with DMSO (**C**, N=9, **D**, N=12), rapamycin (**C**) (20 nM, 72 h, N=9) or Torin1 (**D**) (40 nM, 72 h, N=12) in HUH7 cancer cells. Bar graphs are presented as mean  $\pm$  SD from biological independent samples. Statistical testing was performed by a two-sided unpaired Student's t test.

**Figure S3**

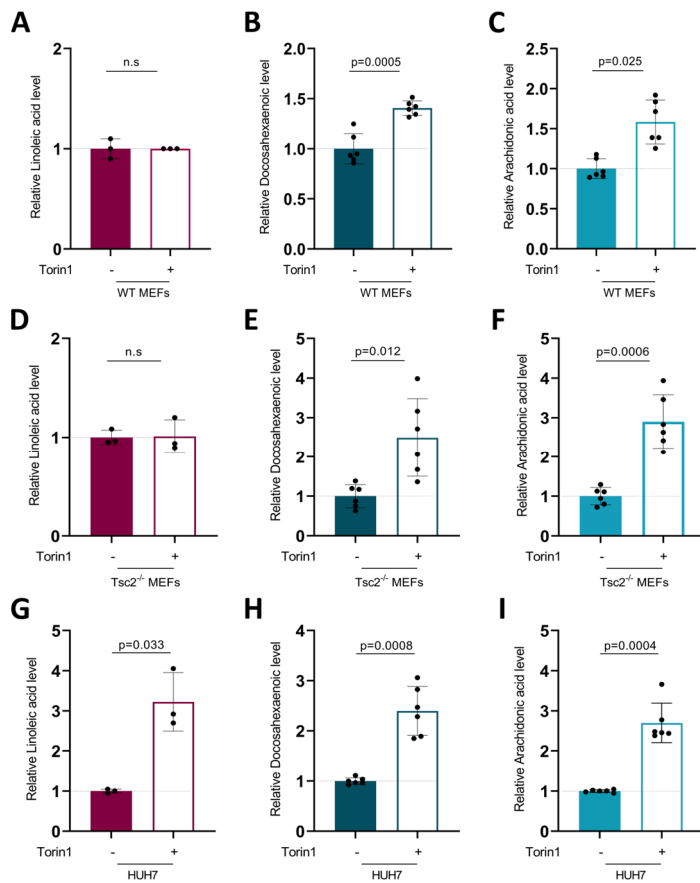

**Figure S3:** mTOR inhibition results in elevated polyunsaturated fatty acid levels, Related to **Figure 2** and **Figure 3**

(A-C) Relative levels of linoleic acid (A), docosahexaenoic acid (B) and arachidonic acid (C) in the wildtype (WT) MEFs upon treatment with DMSO or Torin1 (40 nM, 72 h, A, N=3, B-C, N=6). Bar graphs are presented as mean  $\pm$  SD from biological independent samples. Statistical testing was performed by a two-sided unpaired Student's t test.

(D-F) Relative levels of linoleic acid (D), docosahexaenoic acid (E) and arachidonic acid (F) in the Tsc2<sup>-/-</sup> MEFs upon treatment with DMSO or Torin1 (40 nM, 72 h, D, N=3, E-F, N=6). Bar graphs are presented as mean  $\pm$  SD from biological independent samples. Statistical testing was performed by a two-sided unpaired Student's t test.

(G-I) Relative levels of linoleic acid (G), docosahexaenoic acid (H) and arachidonic acid (I) in the HUH7 cancer cells upon treatment with DMSO or Torin1 (40 nM, 72 h, G, N=3, H-I, N=6). Bar graphs are presented as mean  $\pm$  SD from biological independent samples. Statistical testing was performed by a two-sided unpaired Student's t test.

**Figure S4**

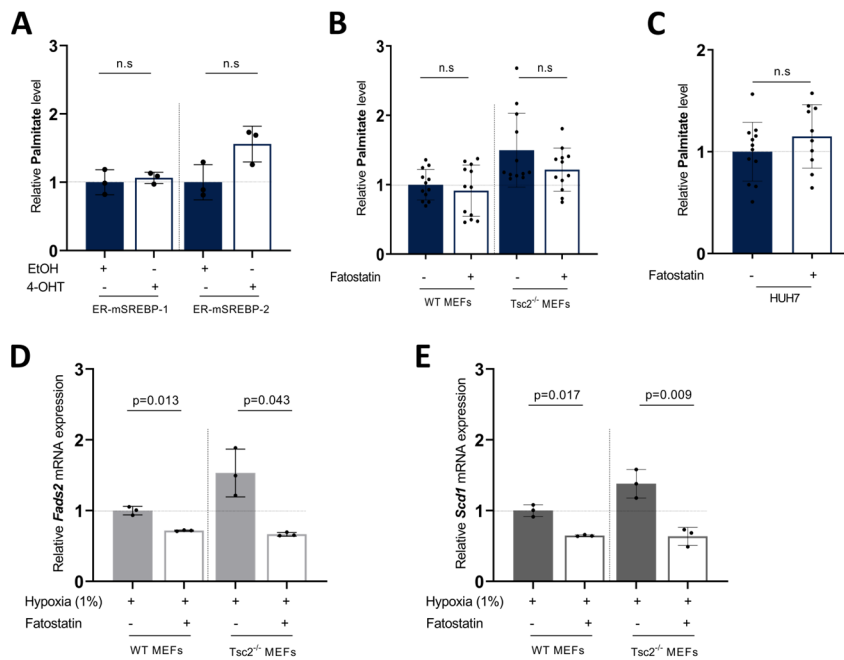

**Figure S4:** SREBP modulation does not alter palmitate level and regulates *Fads2* and *Scd1* transcription in hypoxia, Related to **Figure 4**

**(A)** Relative palmitate level was determined in U87 cells stably expressing ER-mSREBP-1 or ER-mSREBP-2. Cells were treated with 100 nM 4-OHT or solvent for 24h in medium containing 10% FBS (N=3). Bar graphs are presented as mean  $\pm$  SD from biological independent samples. Statistical testing was performed by a two-sided unpaired Student's t test.

**(B, C)** Palmitate level upon treatment with DMSO (N=12) or fatostatin (10  $\mu$ M, 72 h, **B**, N=12, **C**, N=10) in WT and Tsc2<sup>-/-</sup> MEFs (**B**) and in HUH7 cancer cells (**C**). Bar graphs are presented as mean  $\pm$  SD from biological independent samples. Statistical testing was performed by a two-sided unpaired Student's t test.

**(D, E)** *Fads2* (**D**) and *Scd1* (**E**) mRNA expression in WT and Tsc2<sup>-/-</sup> MEFs cells treated with fatostatin (10  $\mu$ M, 48 h, N=3) combined with hypoxia (1% O<sub>2</sub>). Relative mRNA levels were determined by qPCR. Bar graphs are presented as mean  $\pm$  SD from biological independent samples. Statistical testing was performed by a two-sided unpaired Student's t test.

**Table S5:** qPCR primer sequences list, Related to **KEY RESOURCES TABLE**

|              | <b>Gene</b>           | <b>Forward (5'-3')</b>  | <b>Reverse (5'-3')</b>  |
|--------------|-----------------------|-------------------------|-------------------------|
|              | <i>FADS2</i>          | GACCACGGCAAGAACTCAAAG   | GAGGGTAGGAATCCAGCCATT   |
|              | <i>SCD1</i>           | TCTCTGCTACACTTGGGAGC    | GAGCTTTGTAAGAGCGGTGG    |
| <b>Human</b> | <i>FADS2 (Site A)</i> | TCTGCTGATCGCTGTGGAAACT  | TCAGCCCTCCCCTATGGACTTT  |
|              | <i>FADS2 (Site B)</i> | TGGAGGCAAAAGTCCATAGC    | GATCCCTGGCTTCCCAGT      |
|              | <i>ACTB</i>           | GCCTCGCCTTTGCCGAT       | CGCGGCGATATCATCATCC     |
|              | <i>RPL19</i>          | ACCCCA ATGAGACCA ATG AA | CGCAAAATCCTCATTCTCCT    |
|              | <i>Fads2</i>          | ATAGTAGCTGATGGCCCAAGC   | AGCCCCTTGAGTATGGCAAG    |
| <b>Mouse</b> | <i>Scd1</i>           | CGCTCTTTACCCTTTGCTGG    | AAGAACTGGAGATCTCTTGGAGC |
|              | <i>Rpl19</i>          | CAGGCATATGGGCATAGGGAA   | TGCCTTCAGCTTGTGGATGT    |
